# Supplementary material for: Host oxidative stress primes mycobacteria for rapid antibiotic resistance evolution
Source: Research Square preprint supplement (doi:10.21203/rs.3.rs-8167376/v1), 2025-12-04
Supplement: Supplementary file [file ae475157b1a9c385539f00dd.pdf]

## Supplemental Figures

Pepper-Tunick et. al.

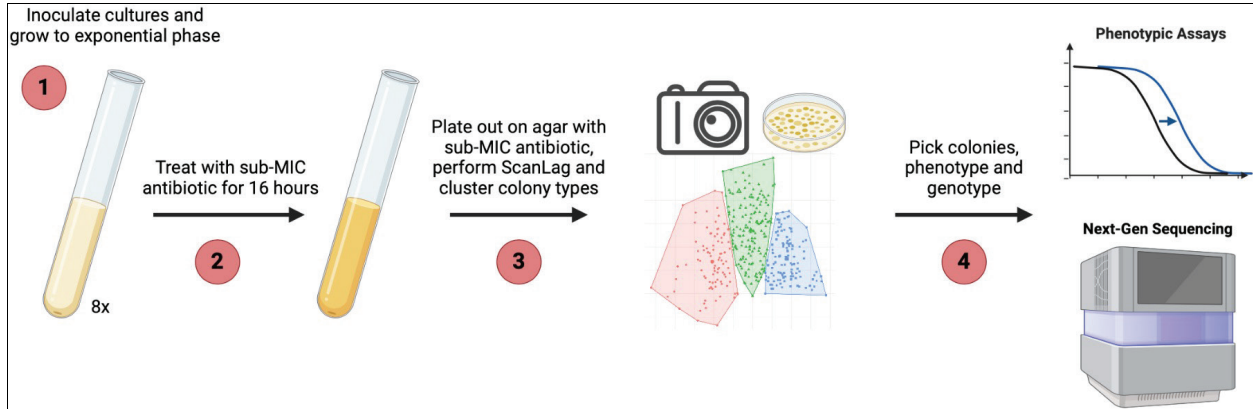

**Figure S1: A subinhibitory antibiotic treatment to enrich for pre-resistant mutants. (1)** Biological replicates of *Msm mc<sup>2</sup>155* cultures reach log phase ( $OD_{600}$  0.6–1.0). **(2)** Replicate cultures are  $OD_{600}$  normalized into fresh liquid media and  $2\times IC_{50}$  INH is added. Cultures are incubated at  $37^{\circ}C$  for 16 hours **(3)** Cultures are plated out on solid 7H10 agar either with or without  $2\times IC_{50}$  INH and ScanLag is performed. ScanLag data is then processed and colonies are clustered based on their growth characteristics. **(4)** Representative colonies from each cluster are then picked, grown isogenically, phenotyped for shifts in their  $IC_{50}$ , and sequenced using whole genome sequencing technologies to identify mutation(s) that confer the corresponding phenotype.

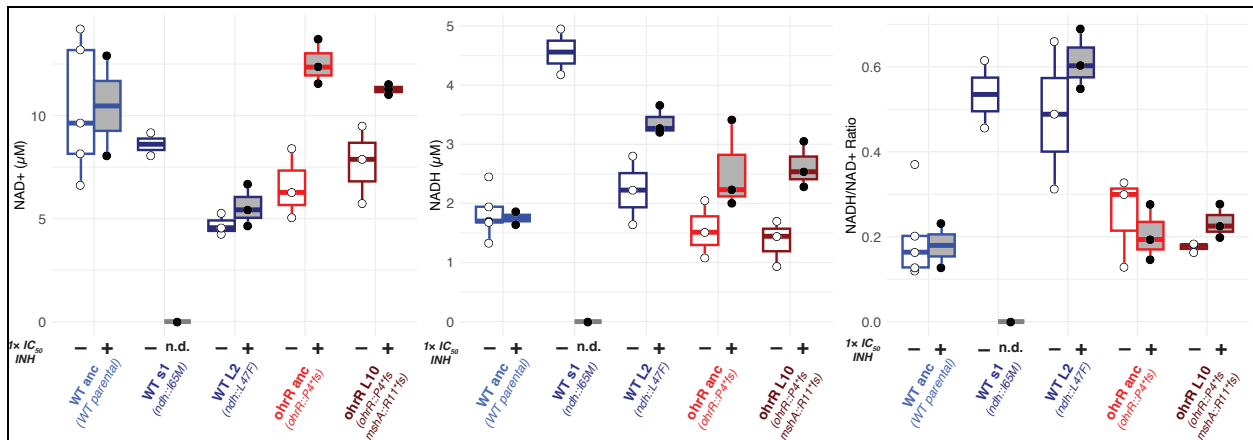

**Figure S2: NAD<sup>+</sup> quantification, NADH quantification, and NADH/NAD<sup>+</sup> ratio during log phase growth of the wildtype, wildtype-derived INH<sup>R</sup> strains s1 (*ndh::l65M*) and L2 (*ndh::L47F*), *ohrR::P4\*fs* LLRT strain, and its derived INH<sup>R</sup> strain L10 (*ohrR::P4\*fs - mshA::R11\*fs*) in the absence (indicated with “(-)”) and presence (indicated with “(+)”) of  $1\times IC_{50}$  INH.**

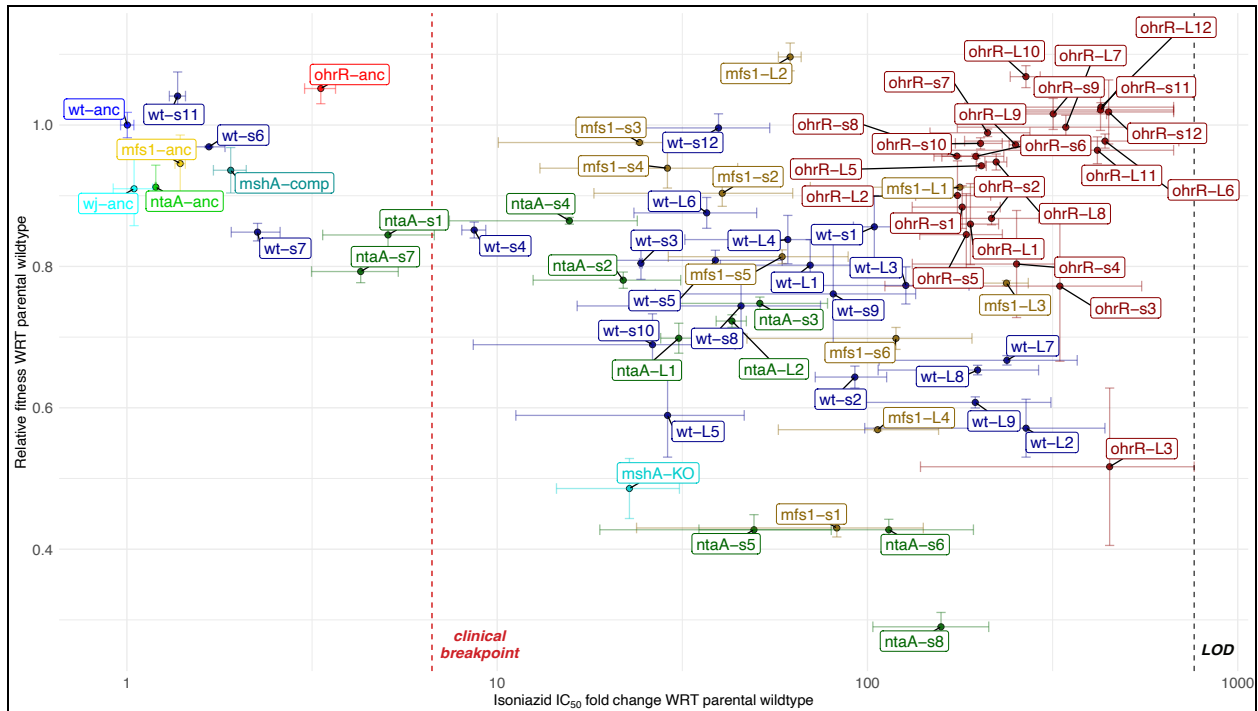

**Figure S3:** Various strains shown were grown to log phase and phenotyped in a dose response assay to quantify the INH  $IC_{50}$  fold change and relative fitness with respect to the wildtype strain which they were originally derived from. Strain labels: wt-anc: Nitin Baliga Lab wildtype Msm mc<sup>2</sup>155; wj-anc: William Jacobs Lab wildtype Msm mc<sup>2</sup>155; *mshA*-KO:  $\Delta mshA$  knockout derived from W.J. wildtype; *mshA*-comp:  $\Delta mshA$  pMV361::*mshA* complemented strain derived from W.J. wildtype; *mfs1*-anc: *mfs1*::G105D; *ntaA*-anc: *ntaA*\_5::E50\*fs; *ohrR*-anc: *ohrR*::P4\*fs. All remaining strains were derived from fluctuation assay of wildtype or LLRT strains.

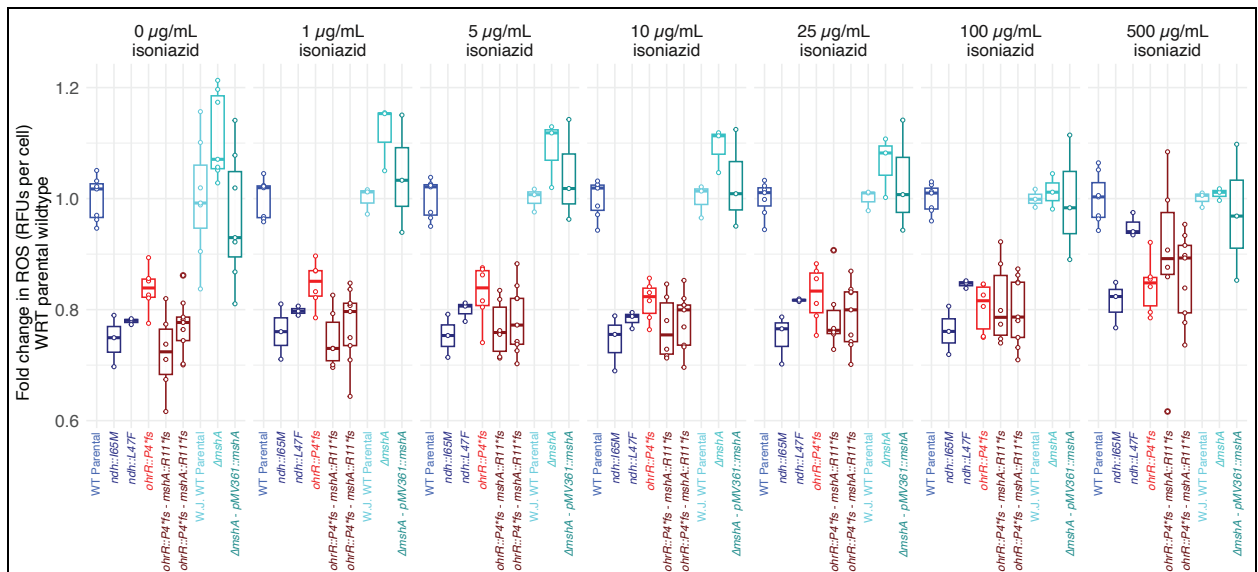

**Figure S4:** Various strains shown were grown to log phase ( $OD_{600}$  0.6–1.0) and then normalized to  $8.0 \times 10^6$  cells / mL before exposing them to the fluorescent dye 2',7'-dichlorodihydrofluorescein diacetate (H2DCFDA), with or without INH at the specified concentration. RFUs were measured after 1 hour of incubation at 37°C and normalized back to the cell count. Fold change RFUs for

each strain is the ratio of the RFUs for a given sample relative to the RFUs of the wildtype strain from which each strain was derived, under the same conditions.

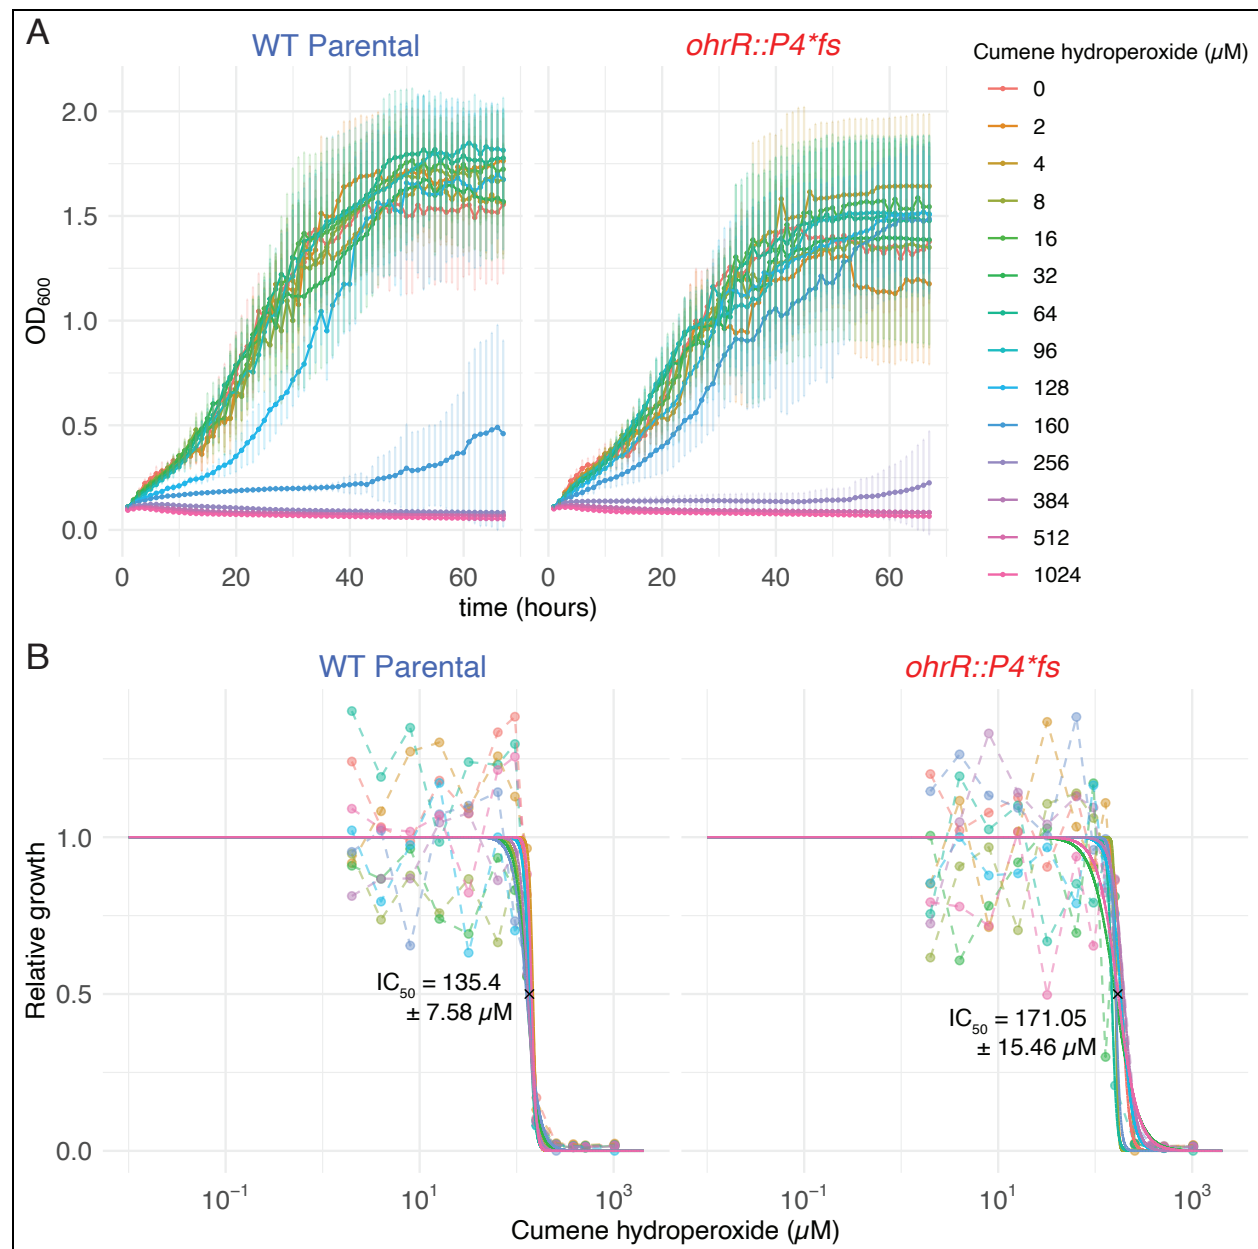

**Figure S5:** Dose response assay of wildtype and *ohrR::P4\*fs* in cumene hydroperoxide. Strains shown were grown to log phase (OD<sub>600</sub> 0.6–1.0) and then normalized to OD<sub>600</sub> 0.02 before subjecting to a dose escalation of cumene hydroperoxide. OD<sub>600</sub> was measured over 48 hours of growth. Growth curves and dose response curves were generated as described in the Methods.
